# Supplementary material for: Community-acquired and hospital-acquired medication harm among older inpatients and impact of a state-wide medication management intervention
Source: PubMed Central journal article supplement — BMJ Qual Saf. 2018 Oct 18;28(2):103–10. doi: 10.1136/bmjqs-2018-008418 (PMC6860727; doi:10.1136/bmjqs-2018-008418), 2018-10-18
Supplement: bmjqs-2018-008418supp001.pdf [file bmjqs-2018-008418supp001.pdf]

This table displays results from the mixed-effects models, including the parameter estimates, standard errors and 95% confidence intervals of the parameter estimates, and p-values. This table shows the independent effect of each variable – intervention, time, and case mix – on the rate of admissions with community-acquired medication-harm and on the rate with hospital-acquired harm as well as the key parameter of interest – intervention by time interaction – to determine if each rate was associated with timing of implementation of the intervention across Pharm2Pharm hospitals.

Mixed-Model Results for Community-Acquired and Hospital-Acquired Medication-Related Admission Rates

| Variable                         | Parameter Estimate | Standard Error | 95% Confidence Interval | P-Value |
|----------------------------------|--------------------|----------------|-------------------------|---------|
| Community-Acquired Rate          |                    |                |                         |         |
| Intervention                     | -62.43             | 23.10          | -107.98 to -16.87       | .01     |
| Time                             | -4.60              | 1.34           | -7.58 to -1.61          | .01     |
| Case mix                         | 10.40              | 12.60          | -14.46 to 35.26         | .41     |
| Intervention x Time <sup>a</sup> | 4.28               | 1.32           | 1.67 to 6.88            | .001    |
| Hospital-Acquired Rate           |                    |                |                         |         |
| Intervention                     | 1.61               | 12.28          | -22.61 to 25.84         | .90     |
| Time                             | -0.16              | 0.70           | -1.71 to 1.40           | .83     |
| Case mix                         | 19.07              | 7.18           | 4.91 to 33.23           | .01     |
| Intervention x Time              | 0.11               | 0.70           | -1.28 to 1.49           | .88     |

<sup>a</sup>The decrease in community-acquired medication-related hospitalization rate per 1,000 admissions of participants aged 65 and older over time in intervention hospitals was 4.3 per quarter greater than in nonintervention hospitals.
