# Supplementary material for: Community-acquired and hospital-acquired medication harm among older inpatients and impact of a state-wide medication management intervention
Source: PubMed Central journal article supplement — BMJ Qual Saf. 2018 Oct 18;28(2):103–10. doi: 10.1136/bmjqs-2018-008418 (PMC6860727; doi:10.1136/bmjqs-2018-008418), 2018-10-18
Supplement: bmjqs-2018-008418supp002.pdf [file bmjqs-2018-008418supp002.pdf]

This table shows the frequency for each AHRQ-defined medication category and, for those categories with a frequency of at least 400 codes, the p-value of the intervention by time effect from the mixed effects model analysis. There were 367 codes in our data that are not included in any of the AHRQ medication categories.

Frequencies of Community-Acquired Medication Adverse Outcome by AHRQ category from 2010-2014 and p value of medication management intervention by time effect for categories with frequency of 400 or more

| <b>AHRQ major categories and sub-categories</b>                                      | <b>Frequency</b> | <b>p value</b>  |
|--------------------------------------------------------------------------------------|------------------|-----------------|
| <b>Agents that affect blood constituents</b>                                         | <b>2020</b>      | <b>&lt;.001</b> |
| <i>Anticoagulants</i>                                                                | 1869             | <.0001          |
| <i>Blood agents not elsewhere classified</i>                                         | 114              |                 |
| <b>Cardiovascular drugs</b>                                                          | <b>1436</b>      | <b>.12</b>      |
| <i>Other antihypertensive agents (e.g., clonidine, guanethidine, reserpine)</i>      | 421              | .45             |
| <i>Cardiotonic glycosides and drugs of similar action (e.g., digitalis, digoxin)</i> | 338              |                 |
| <i>Cardiac rhythm regulators (e.g., propranolol, quinidine)</i>                      | 121              |                 |
| <i>Coronary vasodilators (e.g., nitroglycerin)</i>                                   | 91               |                 |
| <i>Antilipemics</i>                                                                  | 182              |                 |
| <i>Other and unspecified agents primarily affecting the cardiovascular system</i>    | 271              |                 |
| <b>Analgesics, antipyretics, and antirheumatics</b>                                  | <b>1320</b>      | <b>.17</b>      |
| <i>Opiates (e.g., codeine, morphine for pain control)</i>                            | 479              | .12             |
| <i>Aromatic analgesics</i>                                                           | 62               |                 |
| <i>Salicylates</i>                                                                   | 277              |                 |
| <i>Antirheumatics</i>                                                                | 182              |                 |
| <i>Other and unspecified analgesics and antipyretics</i>                             | 291              |                 |
| <b>Systemic agents</b>                                                               | <b>1308</b>      | <b>.38</b>      |
| <i>Antineoplastic and immunosuppressive drugs</i>                                    | 1233             | .57             |
| <i>Antiallergy and antiemetic drugs</i>                                              | 47               |                 |
| <i>Systemic agents not elsewhere classified</i>                                      | 19               |                 |
| <b>Hormones and synthetic substitutes</b>                                            | <b>1240</b>      | <b>.54</b>      |
| <i>Corticosteroids</i>                                                               | 804              | .33             |
| <i>Insulin and antidiabetic agents</i>                                               | 336              |                 |
| <i>Other and unspecified hormones</i>                                                | 53               |                 |
| <b>Water, mineral, and uric acid metabolism drugs</b>                                | <b>976</b>       | <b>.11</b>      |
| <i>Diuretics other than saluretics (e.g. ethacrynic acid, furosemide)</i>            | 430              | .86             |
| <i>Saluretics (e.g., chlorothiazides)</i>                                            | 436              | .10             |
| <b>Antibiotics</b>                                                                   | <b>526</b>       | <b>.99</b>      |
| <i>Penicillins</i>                                                                   | 89               |                 |
| <i>Cephalosporin antibiotics</i>                                                     | 64               |                 |
| <i>Other specified antibiotics</i>                                                   | 321              |                 |
| <b>Psychotropic agents (other than hallucinogens, amphetamines, and caffeine)</b>    | <b>487</b>       | <b>.79</b>      |

|                                                                                             |            |
|---------------------------------------------------------------------------------------------|------------|
| <i>Benzodiazepine-based tranquilizers</i>                                                   | 222        |
| <i>Antidepressants</i>                                                                      | 114        |
| <i>Antipsychotic agents other than phenothiazine- and butyrophenone-based tranquilizers</i> | 87         |
| <i>Other psychotropics agents (specified or unspecified)</i>                                | 33         |
| <b><i>Drugs effecting autonomic nervous system</i></b>                                      | <b>372</b> |
| <b><i>Other and unspecified drugs and medicinal substances</i></b>                          | <b>291</b> |
| <b><i>Other anti-infectives</i></b>                                                         | <b>284</b> |
| <b><i>Anticonvulsants and anti-Parkinson drugs</i></b>                                      | <b>216</b> |
| <b><i>Sedatives and hypnotics</i></b>                                                       | <b>212</b> |
| <b><i>Agents effecting skin, mucous membranes, eye, ENT, and dental</i></b>                 | <b>81</b>  |
| <b><i>Agents acting on smooth and skeletal muscles and respiratory system</i></b>           | <b>68</b>  |
| <b><i>Central nervous system depressants and anesthetics</i></b>                            | <b>66</b>  |
| <b><i>Agents effecting the gastrointestinal system (e.g., cathartics)</i></b>               | <b>43</b>  |
| <b><i>Central nervous system stimulants (e.g., opiate antagonists)</i></b>                  | <b>15</b>  |
| <b><i>Vaccines and biological substances</i></b>                                            | <b>12</b>  |
