# Supplementary material for: Community-acquired and hospital-acquired medication harm among older inpatients and impact of a state-wide medication management intervention
Source: PubMed Central journal article supplement — BMJ Qual Saf. 2018 Oct 18;28(2):103–10. doi: 10.1136/bmjqs-2018-008418 (PMC6860727; doi:10.1136/bmjqs-2018-008418), 2018-10-18
Supplement: bmjqs-2018-008418supp003.pdf [file bmjqs-2018-008418supp003.pdf]

This table shows the frequency for each AHRQ-defined harm category and the p-value of the intervention by time effect from the mixed effects model analysis of the two categories with a frequency of at least 400 codes.

Frequencies of Community-Acquired Medication Adverse Outcome by AHRQ harm type from 2010-2014 and p value of medication management intervention by time effect for categories with frequency of 400 or more

| <i>AHRQ harm type categories and sub-categories</i>                                            | <i>Frequency</i> | <i>p value</i> |
|------------------------------------------------------------------------------------------------|------------------|----------------|
| <b>Adverse Effects<sup>1</sup></b>                                                             | <b>10140</b>     | <b>.001</b>    |
| <i>Drugs, medicinal substances, and biologicals causing adverse effects in therapeutic use</i> | 10140            |                |
| <b>Poisoning<sup>2</sup></b>                                                                   | <b>870</b>       | <b>.76</b>     |
| <i>Poisoning by drugs, medicinal and biological substances</i>                                 | 450              | .37            |
| <i>Accidental poisoning by drugs, medicinal substances, and biologicals</i>                    | 420              | .56            |
| <b>Other Adverse Outcomes<sup>3</sup></b>                                                      | <b>330</b>       |                |
| <i>Neuropathy due to drugs</i>                                                                 | 58               |                |
| <i>Contact dermatitis due to drugs and medicines in contact with skin</i>                      | 11               |                |
| <i>Dermatitis due to drugs or medicines taken internally</i>                                   | 261              |                |

<sup>1</sup> **E930.0–E934.9, E935.1–E949.9** – Drugs, medicinal substances, and biologicals causing adverse effects in therapeutic use (includes correct drug properly administered in therapeutic or prophylactic dosage as the cause of any adverse reaction including allergic or hypersensitivity reactions)

<sup>2</sup> **960.0–964.9, 965.02–969.5, 969.8–979.9** – Poisoning by drugs, medicinal and biological substances (includes overdose of these substances and wrong substances given or taken in error), **E850.1–E858.9** – Accidental poisoning by drugs, medicinal substances, and biologicals (includes accidental overdose, wrong dose given or taken in error, and drug taken inadvertently)

<sup>3</sup> **357.6** – Neuropathy due to drugs, **692.3** – Contact dermatitis due to drugs and medicines in contact with skin, **693.0** – Dermatitis due to drugs or medicines taken internally
